# Supplementary material for: Comparison of Quantitative Detection Methods Based on Molecular Fluorescence Spectroscopy and Chromatographic Techniques Used for the Determination of Bisphenol Compounds
Source: MDPI journal article supplement (doi:10.3390/ijms221910569), 2021-09-29
Supplement: s1 [file s1]

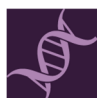

Supplementary materials

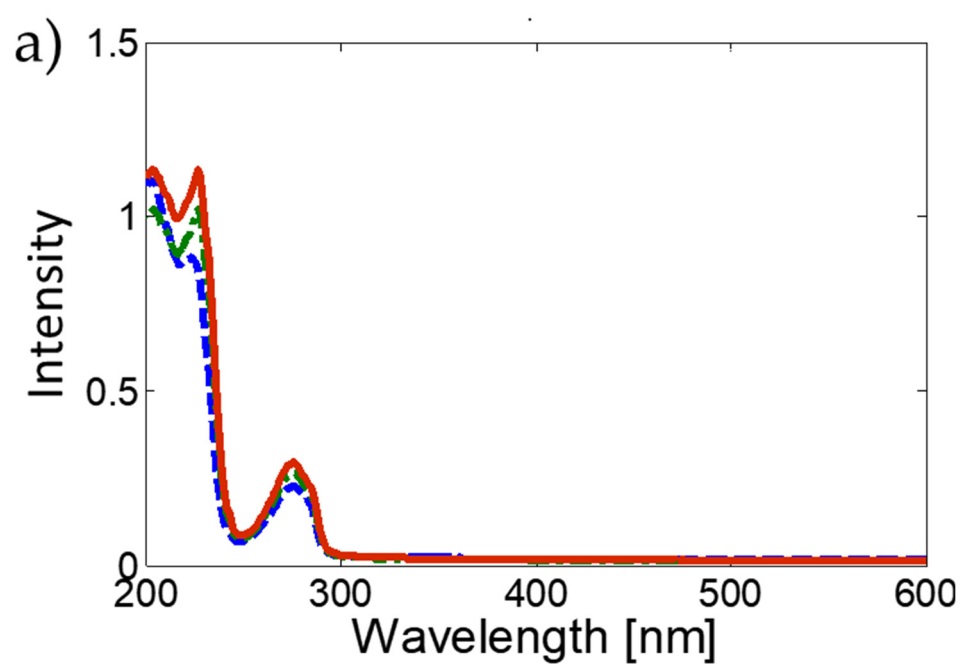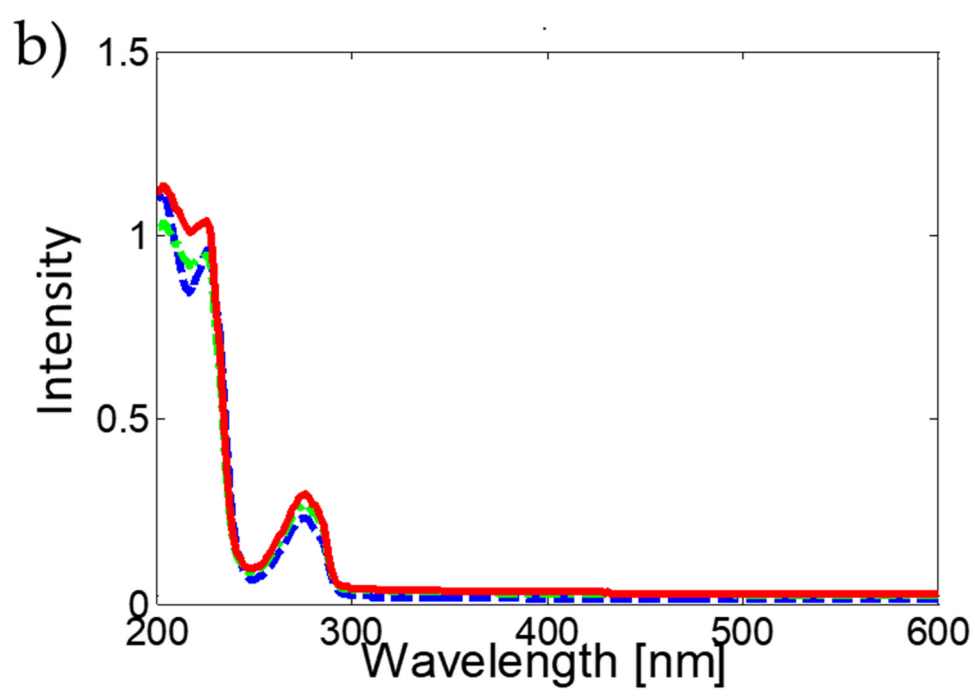

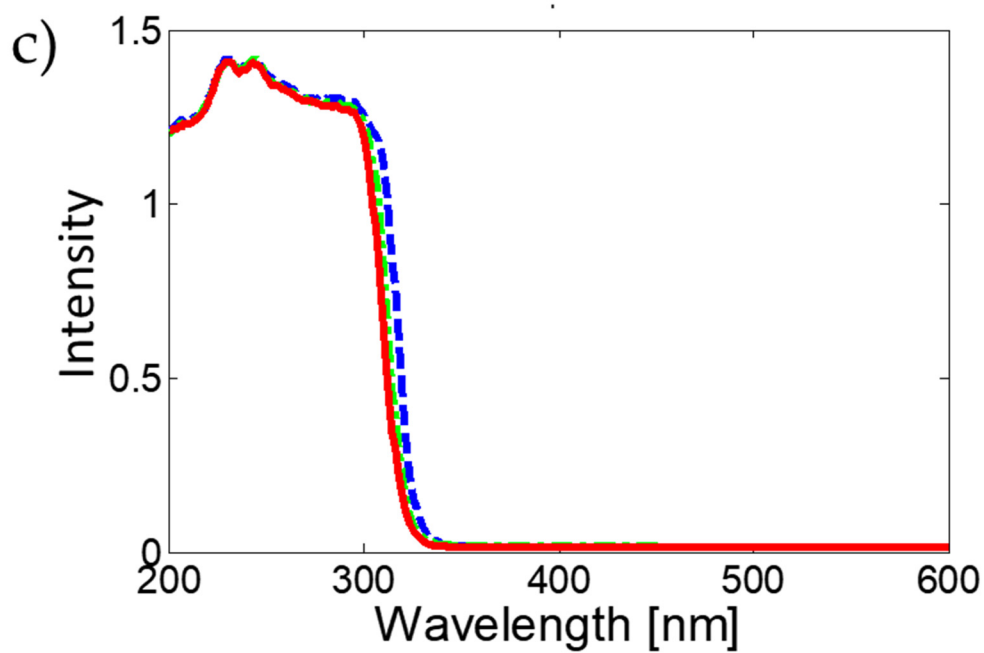

**Figure S1.** Absorption spectra of selected bisphenols and their equimolar complexes with  $\beta$ -CD and m- $\beta$ -CD in phosphate buffer (pH=7.00) for (a) BPA, (b) BPF, and (c) BPS.

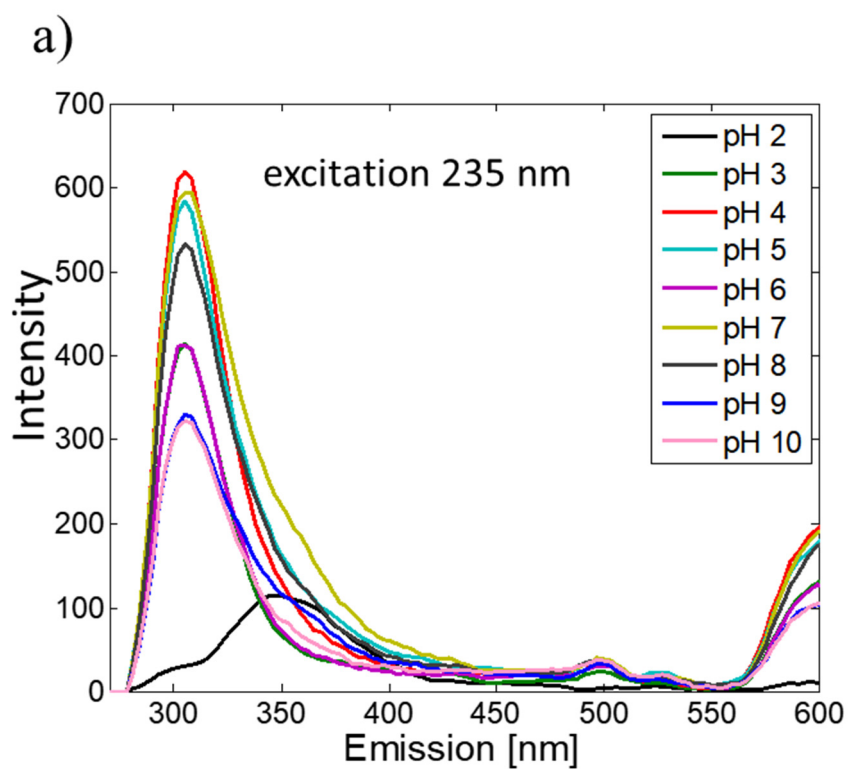

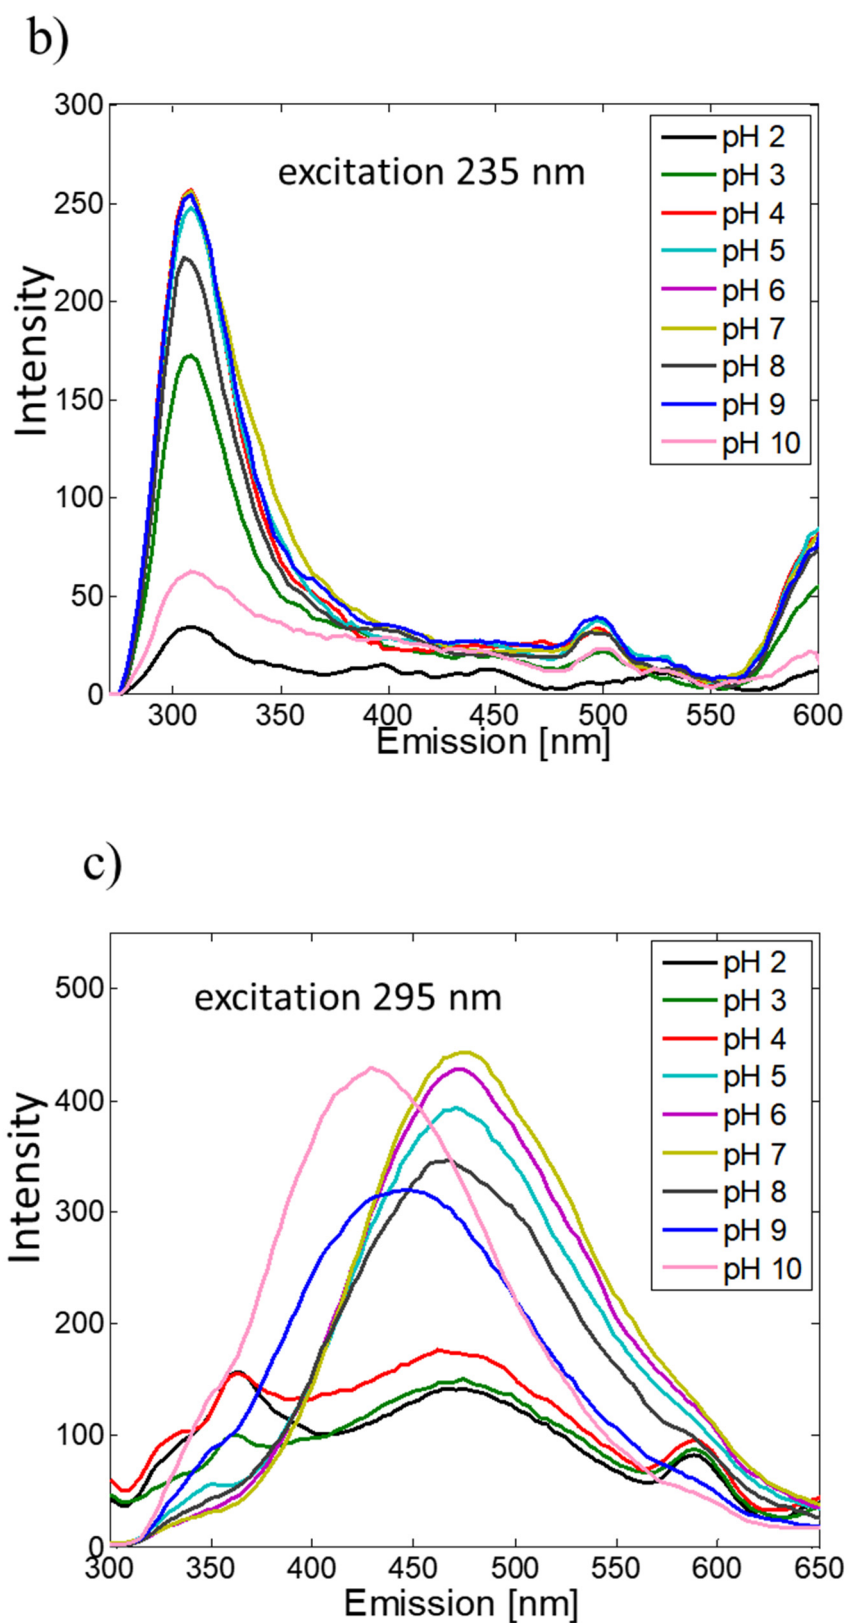

**Figure S2.** Emission spectra of selected bisphenols and their equimolar complexes with  $m$ - $\beta$ -CD under pH 2–10 for (a) BPA, (b) BPF, and (c) BPS.

a)

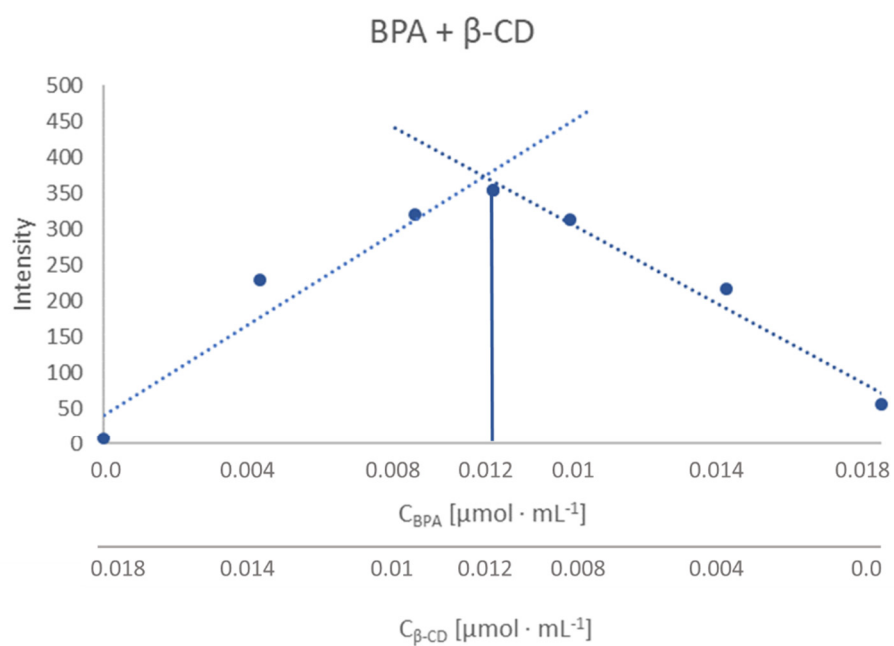

b)

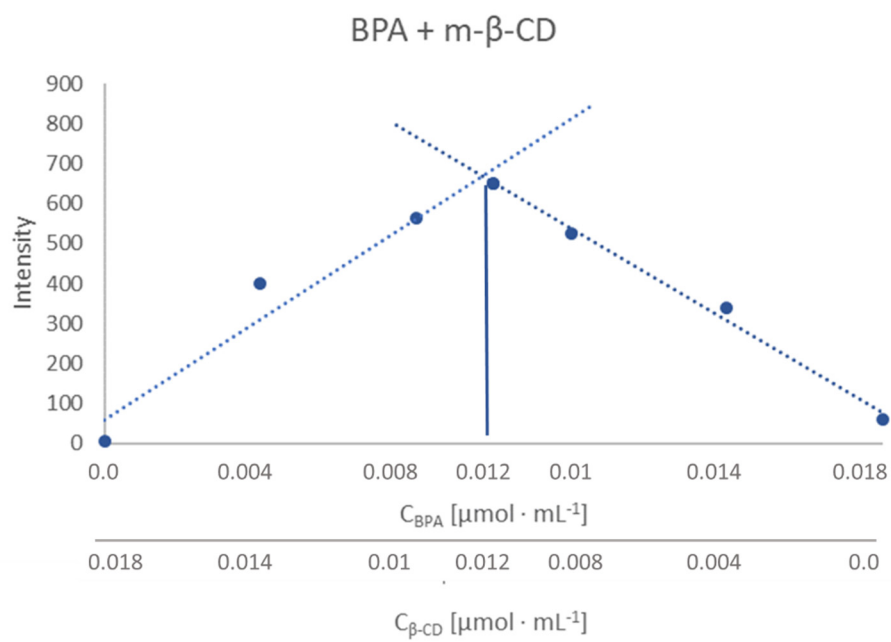

c)

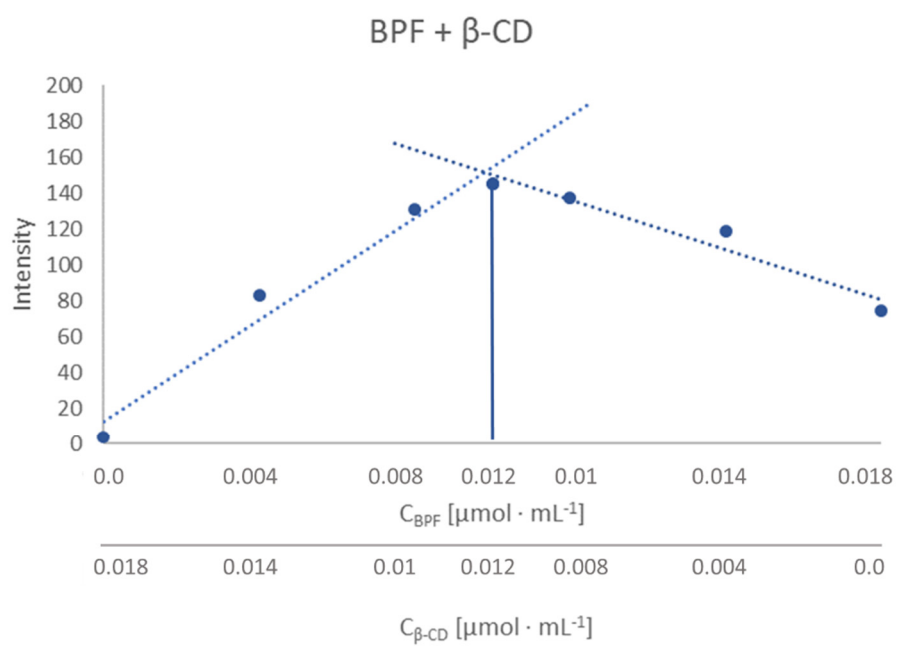

d)

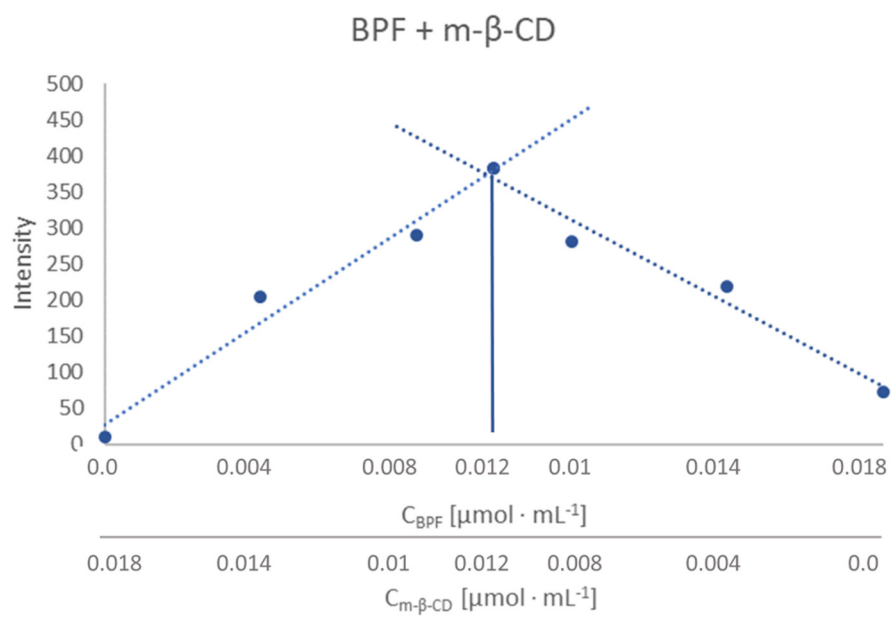

e)

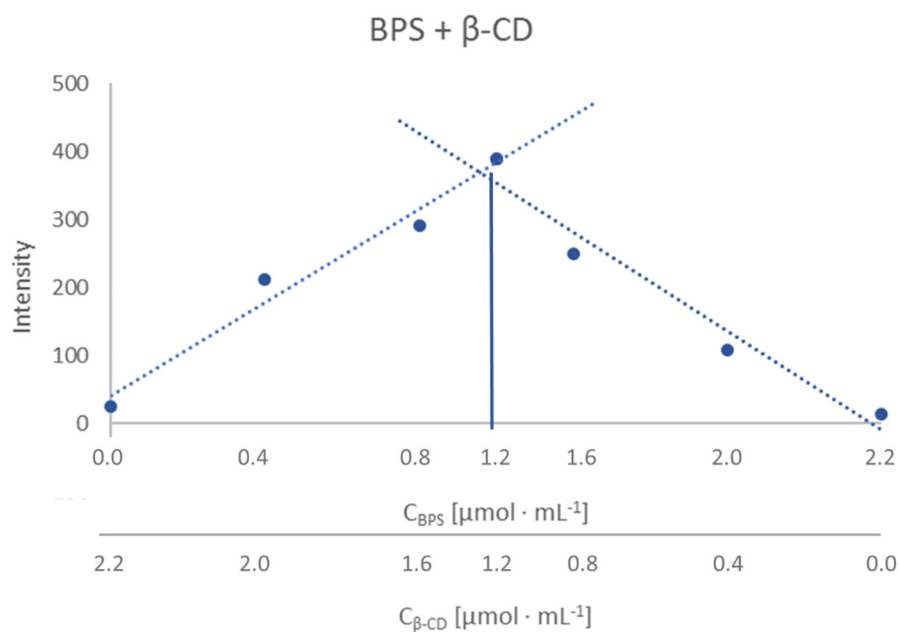

f)

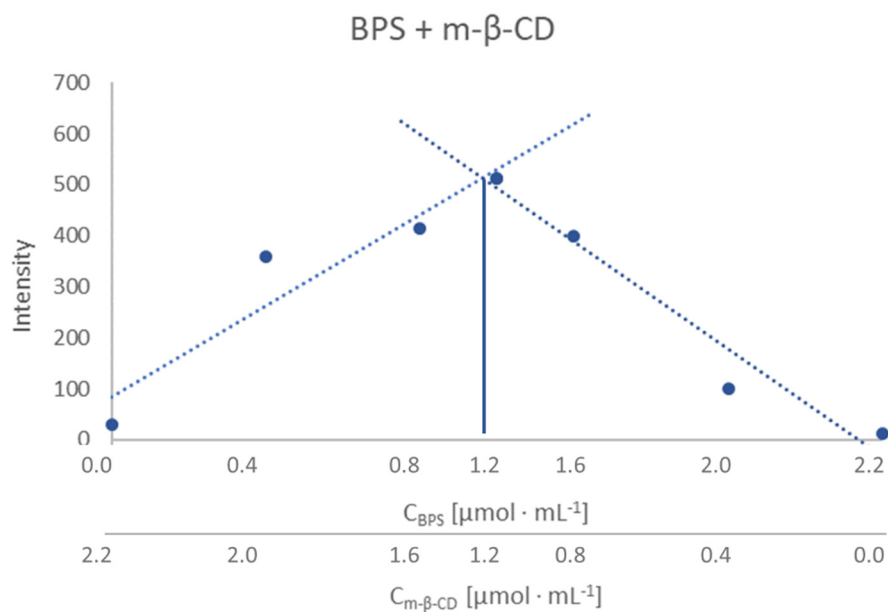

**Figure S3.** Job's plots of equimolar solutions of BPs and CDs compounds for: (a) BPA +  $\beta$ -CD (Ex-citation = 235 nm, Emission = 300 nm), (b) BPA + m- $\beta$ -CD (Excitation = 235 nm, Emission = 300 nm), (c) BPF +  $\beta$ -CD (Excitation = 235 nm, Emission = 304 nm), (d) BPF + m- $\beta$ -CD (Excitation = 235 nm, Emission = 304 nm), (e) BPS +  $\beta$ -CD (Excitation = 295 nm, Emission = 471 nm), (f) BPS + m- $\beta$ -CD (Excitation = 295 nm, Emission = 471 nm).

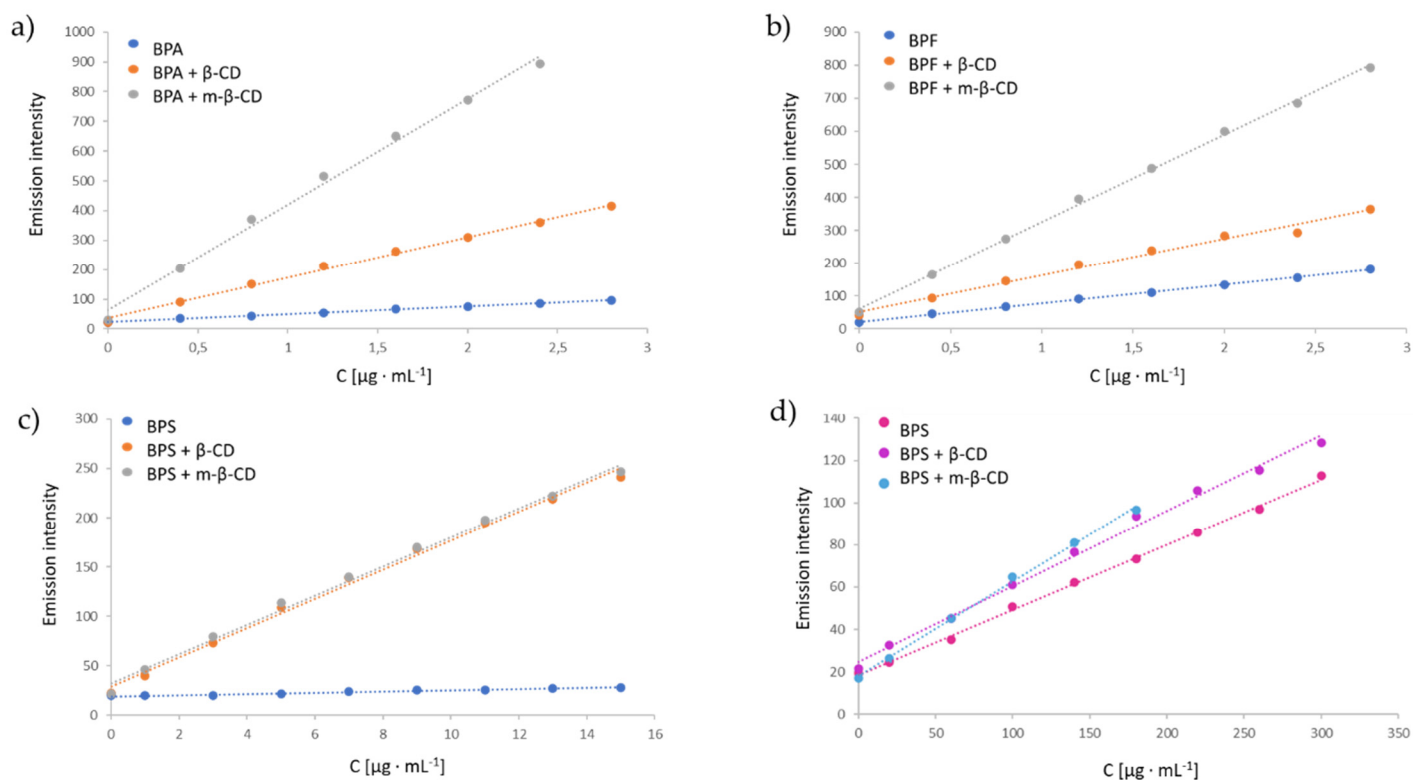

**Figure S4.** Calibration curves for: (a) BPA systems, excitation 235 nm, emission 300 nm; (b) BPF systems, excitation 235 nm, emission 304 nm, (c) BPS systems, excitation 355 nm, emission 400 nm; (d) BPS systems excitation 295 nm emission 471 nm.
